# Supplementary material
Source: PubMed Central journal article supplement (PMC3415494)
Supplement: JB.00910-12_zjb999091843so1.pdf [file JB.00910-12_zjb999091843so1.pdf]

## Supplementary material

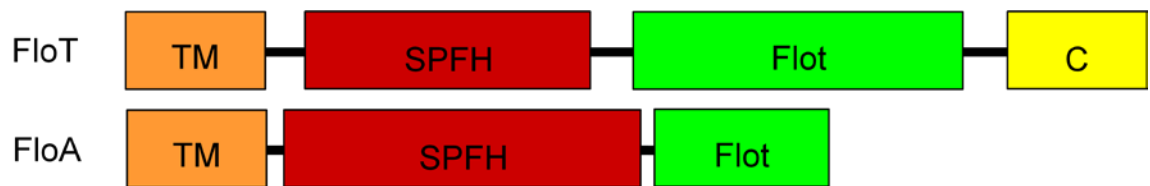

Suppl. Fig 1. Domain structure of FloT and of FloA. TM = transmembrane helix, SPFH = Stomatin, Prohibitin, Flotillin and HflK/C domain, Flot = flotillin-domain, C = domain of unknown function.

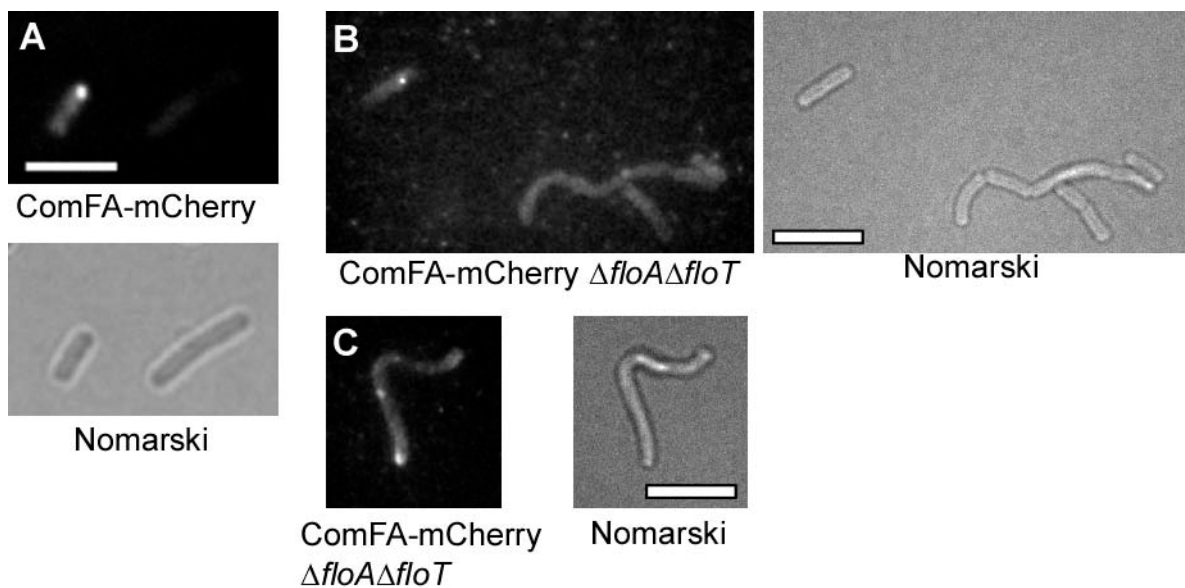

Suppl. Fig. 2 Fluorescence microscopy of *Bacillus subtilis* cells grown to competence, expressing ComFA-mCherry as a marker for the DNA uptake machinery. A) 20% of wild type cells contain the uptake machinery at the cell pole, B-C) ComFA-mCherry in cells carrying a *floT floA* double deletion. White bars 4  $\mu\text{m}$ .

Suppl. Table S1: oligonucleotides used in this study

| description                            | Sequence (5' to 3')                             | Restriction site | direction |
|----------------------------------------|-------------------------------------------------|------------------|-----------|
| 5' megaprimer for <i>yqfA</i> deletion | GAACAACCTGCACCATTGCAAGACCACTCCGGCTGCCAAAGC      |                  | down      |
| 5' megaprimer for <i>yqfA</i> deletion | GAGATGGAAGATGCCGCAG                             |                  | up        |
| 3' megaprimer for <i>yqfA</i> deletion | TTGATCCTTTTTTTATAACAGGAATTTCGACCCTTCGGATGAAGACC |                  | up        |
| 3' megaprimer for <i>yqfA</i> deletion | TAAATTTACTTCTTACCCGCCG                          |                  | down      |
| 5' megaprimer for <i>yqfB</i> deletion | GAACAACCTGCACCATTGCAAGACCGCTGCAATAATAAGCGGATTG  |                  | down      |
| 5' megaprimer for <i>yqfB</i> deletion | CAGCTTTGGCAGCCGGAGTG                            |                  | up        |
| 3' megaprimer for <i>yqfB</i> deletion | TTGATCCTTTTTTTATAACAGGAATTCCTCCACGGGCGAAAAAACC  |                  | up        |
| 3' megaprimer for <i>yqfB</i> deletion | GCGCGGGCTAACATATTTTTC                           |                  | down      |
| For c terminal FloT fusion             | ACTGGGCCCCGAGCAGCTGAGAAAGC                      | <i>ApaI</i>      | up        |
| For c terminal FloT fusion             | CCTGAATTCCTCCACCCTCTGATTTTTGGATCGTTTTGG         | <i>EcoRI</i>     | down      |
| For c terminal YuaF fusion             | TCAGGGCCCCGCGGGCAGCCTTACGCTG                    | <i>ApaI</i>      | up        |

|                                                      |                                          |              |      |
|------------------------------------------------------|------------------------------------------|--------------|------|
| For c<br>terminal<br>YuaF<br>fusion                  | TCAGAATTCCCCACCAATGGGTTCATGCGGAGTAAC     | <i>EcoRI</i> | down |
| For FloT<br>$\Delta$ flot –YFP<br>fusion             | TCAGGGCCCCAAAAGAAATTCTTCGCCGTG           | <i>ApaI</i>  | up   |
| For FloT<br>$\Delta$ flot –YFP<br>fusion             | TCAGAATTCCCCCCTCCTGAAAAGTTCTCAAGCATT     | <i>EcoRI</i> | down |
| For FloT<br>$\Delta$ flot $\Delta$ C –<br>YFP fusion | TCAGGGCCCGAAGCGTTAATTGTAACAGGG           | <i>ApaI</i>  | up   |
| For FloT<br>$\Delta$ flot $\Delta$ C –<br>YFP fusion | TCAGAATTCCCCCCCCGGTTTCCCTAATGATTCAAG     | <i>EcoRI</i> | down |
| For c<br>terminal<br>YqeZ<br>fusion                  | TCAGGGCCCATCCGGTCATTGTCCCTATTC           | <i>ApaI</i>  | up   |
| terminal<br>YqeZ<br>fusion                           | TCAGAATTCCCCGCCAATTTCTCTCACGACAATGCG     | <i>EcoRI</i> | down |
| Disruption<br>of the <i>yqeZ</i><br>gene             | TCA GGG CCC GCG CTC GCA ATG GCT GAC C    | <i>ApaI</i>  | up   |
| Disruption<br>of the <i>yqeZ</i><br>gene             | TCA GAA TTC GCT GAG GCG ATC AAG AGA G    | <i>EcoRI</i> | down |
| For C<br>terminal<br>YqfA<br>fusion                  | TACGGGCCCCGGGGGAGCAGGGGAAG               | <i>ApaI</i>  | up   |
| For C<br>terminal<br>YqfA<br>fusion                  | TACGAATTCCCCGCTCCTGATTTGCGGTCTTCATCCG    | <i>EcoRI</i> | down |
| For yqfA<br>$\Delta$ flot –YFP<br>fusion             | TCAGGGCCCCGCGGGACTTAATGTTGGAAC           | <i>ApaI</i>  | up   |
| For yqfA<br>$\Delta$ flot –YFP<br>fusion             | TCAGAATTCCCCGCCCCCTAAAATTGCCCCGATGTTTTTG | <i>EcoRI</i> | down |

## Supplementary movies

Movie 1: TIRF-M time lapse microscopy of cells expressing FloT-YFP from the original gene locus. Cells grown in S750 minimal medium. Images taken every 3 s, 6 frame/s

Movie 2: TIRF-M time lapse microscopy of cells expressing FloT-YFP from the original gene locus. Cells grown in S750 minimal medium. Images taken every 3 s, 6 frame/s

Movie 3: TIRF-M time lapse microscopy of cells expressing FloA-YFP from the original gene locus. Cells grown in LB rich medium. Images taken every 3 s, 6 frame/s

Movie 4: Epi-fluorescence time lapse microscopy of cells expressing FloA-YFP from the original gene locus. Cells grown in S750 minimal medium. Images taken every 3 s, 6 frame/s

Movie 5: TIRF-M time lapse microscopy of cells expressing FloT-YFP from the original gene locus, 60 min after addition of FCCP (to dissipate the membrane potential). Images taken every 3 s, 6 frame/s

Movie 6: TIRF-M time lapse microscopy of cells expressing NfeD2-YFP from the original gene locus. Cells grown in S750 minimal medium. Images taken every 3 s, 6 frame/s

Movie 7: 3 D reconstruction of Z-stacks taken through an S2 cell expressing FloT-YFP.
